# Supplementary material
Source: Springer Nature journal article supplement (https://www.springermedizin.de/resource/supplementary/12935_2009_210_MOESM1_ESM.pdf/9541380)

**(A) mPEG-ALD**

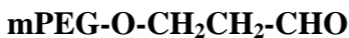

**(B) mPEG-MAL**

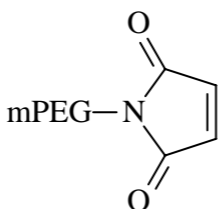

**(C) mPEG-NHS**

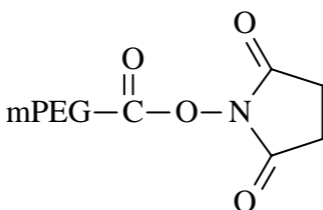

**(D) mPEG-SPA**

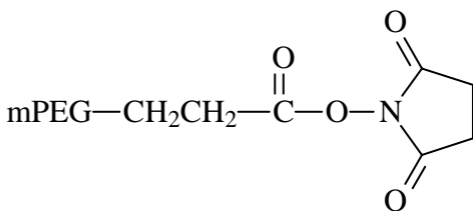

**(E) mPEG-CN**

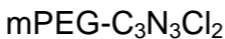

Supplement: MOESM1 [file 9541380]
